# Supplementary material
Source: publisher figshare collection journal article supplement (https://tandf.figshare.com/ndownloader/files/14190740)
Supplement: Supplementary file 1 [file 14190740]

**Supplementary material**

**Table S1.** Summary of GPS data retrieved from five Razorbills actively breeding at Stora Karlsö in 2011 and 2015. Means are given with ± 1 sd. Sex codes are M = male, and U = unknown.

| Bird ID | Year | Sex | Continuous data length (days) | N of trips | Max distance to colony (km) | Mean overall distance to colony (km) |
| --- | --- | --- | --- | --- | --- | --- |
| 8114325 | 2011 | U | 0.56 | 2 | 2.3 | 1.9 ± 0.043 |
| 8114326 | 2011 | M | 0.71 | 1 | 26 | 17 |
| 8114328 | 2011 | M | 0.61 | 2 | 9.3 | 5.5 ± 0.76 |
| 8114401 | 2015 | M | 5.3 | 7 | 42 | 14 ± 11 |
| 8114404 | 2015 | M | 1.3 | 2 | 73 | 26 ± 31 |

**Figure S1.** Relationship between dive duration (s) and dive depth (m) of 7399 dives by 9 Razorbills. Blue line is line of best fit with intercept 29 and slope of 1.9 sm-1.

**
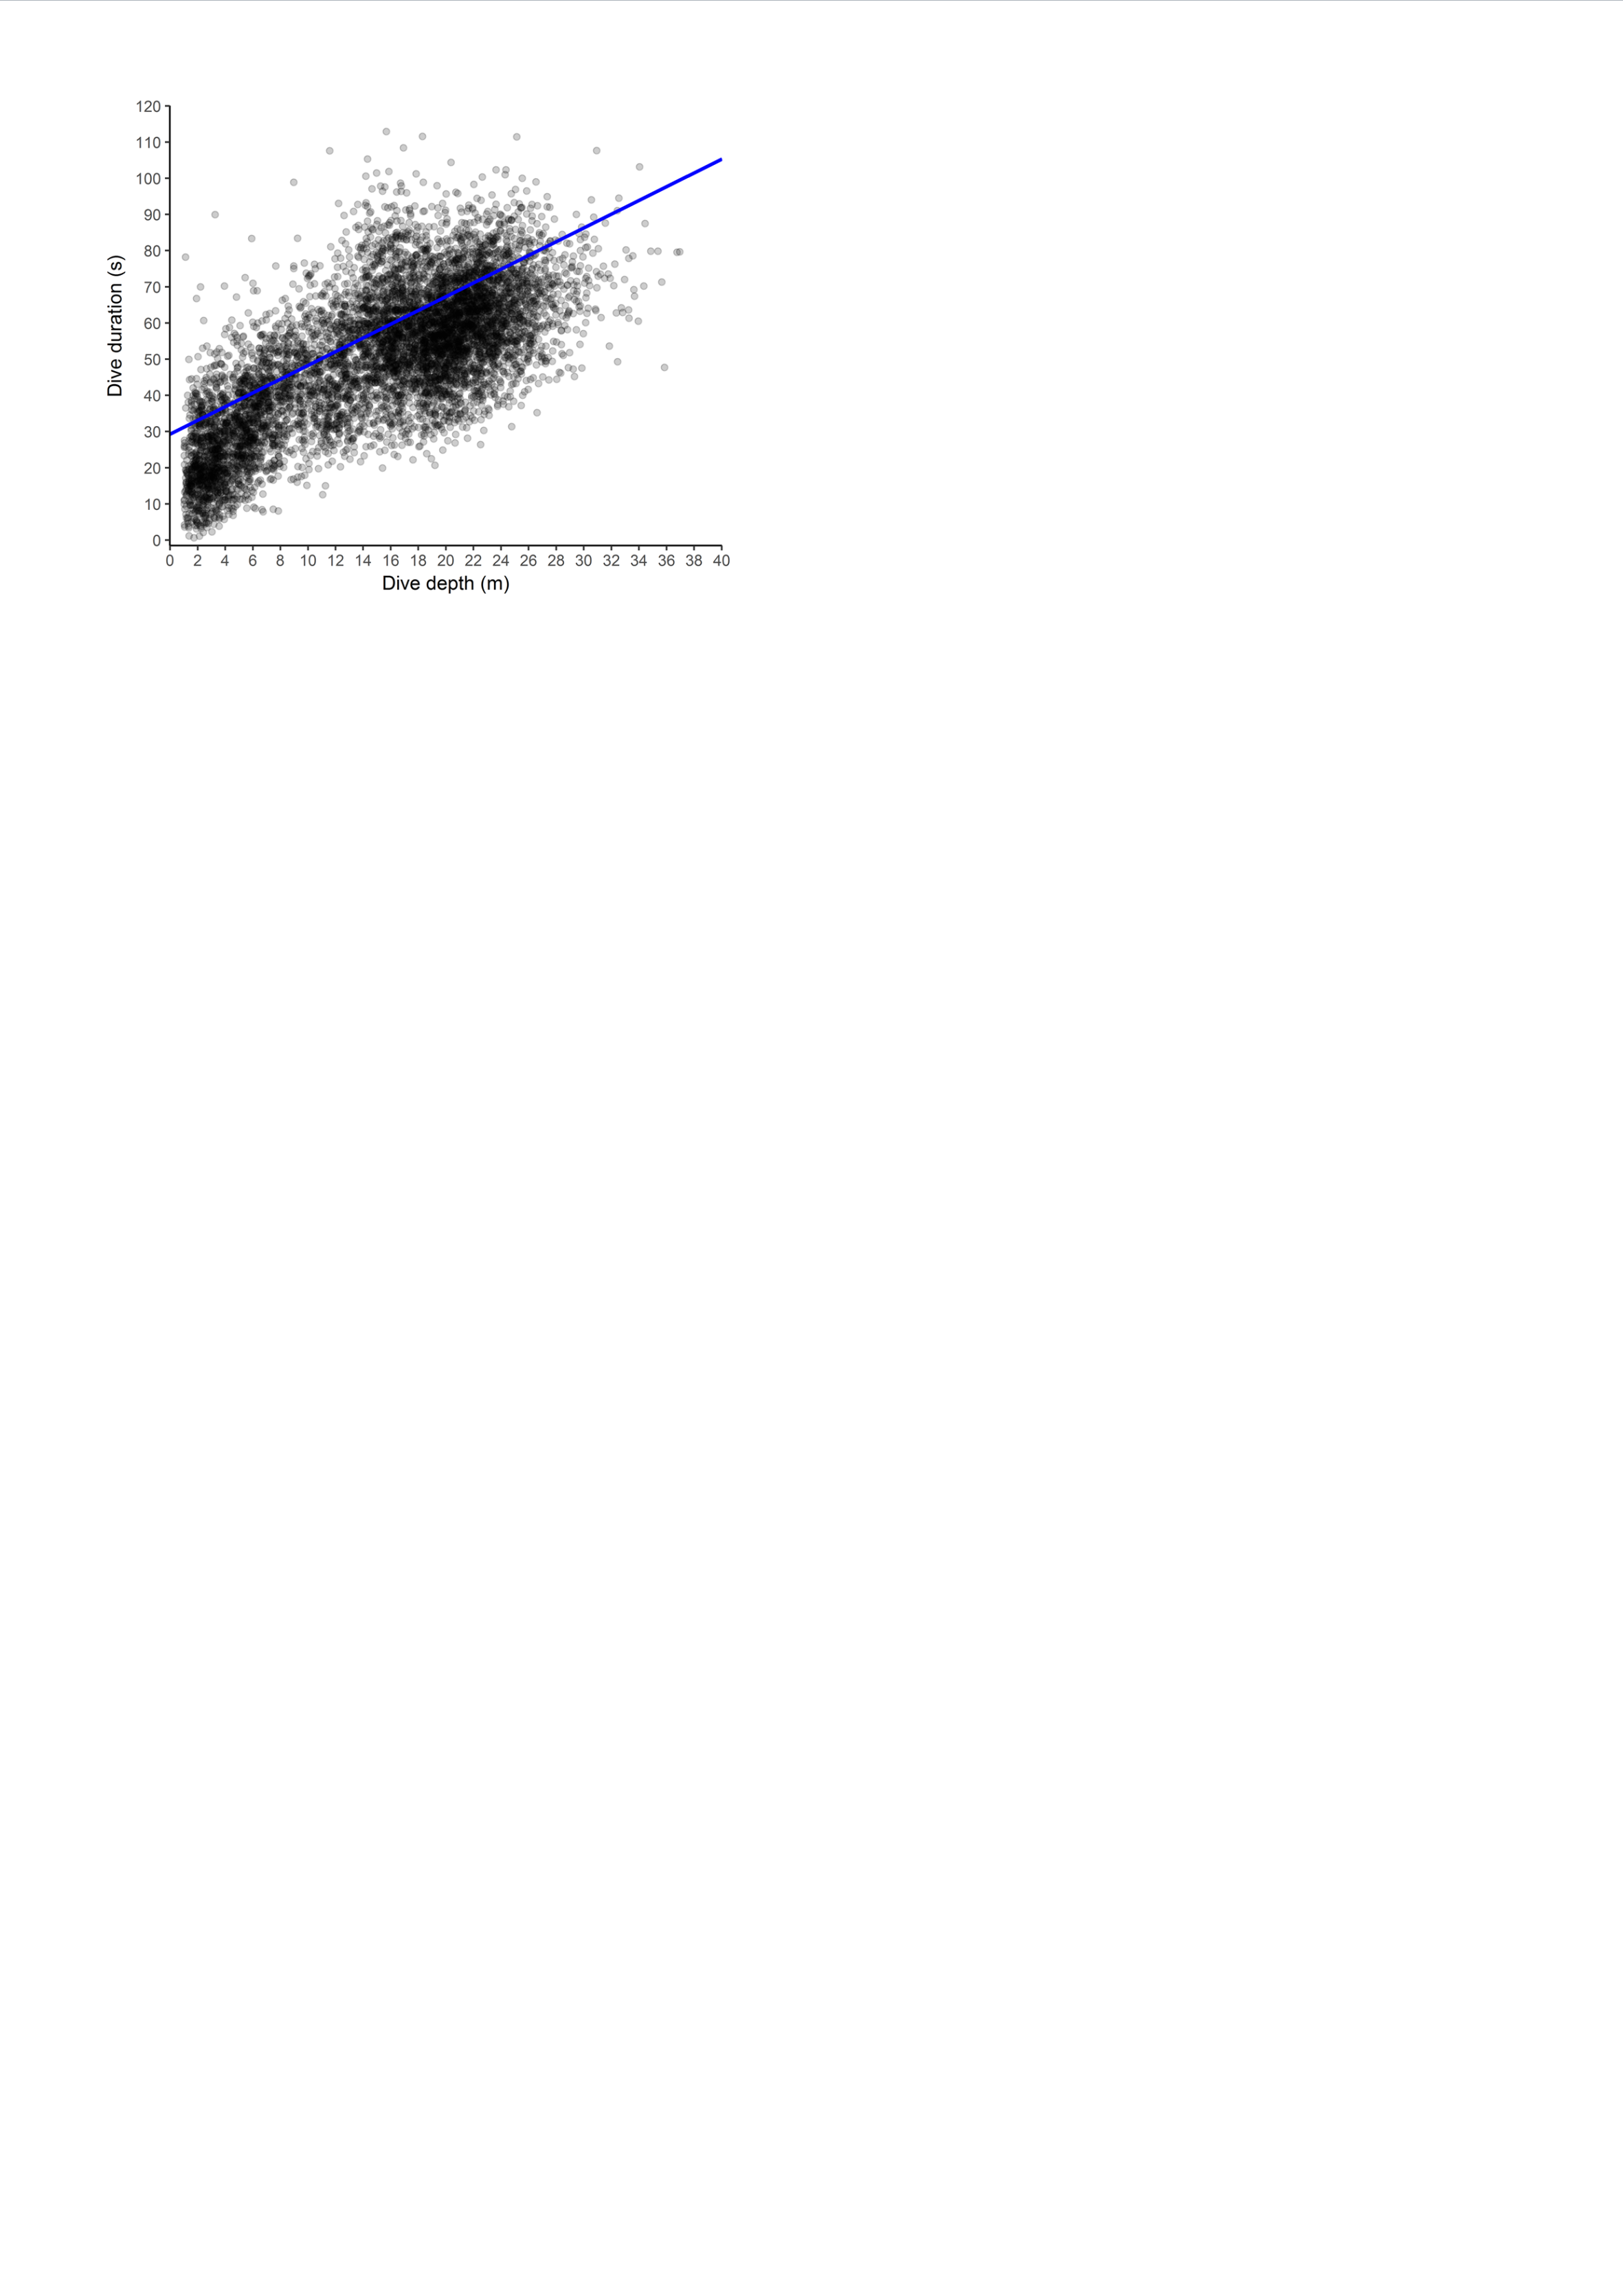
**
